1 **Emergence and spread of SARS-CoV-2 variants from farmed mink to humans and back**  
2 **during the epidemic in Denmark, June-November 2020.**

3

4 Thomas Bruun Rasmussen<sup>1\*</sup>, Amanda Gammelby Qvesel<sup>1,2,3</sup>, Anders Gorm Pedersen<sup>2,3</sup>, Ann  
5 Sofie Olesen<sup>1</sup>, Jannik Fonager<sup>1</sup>, Morten Rasmussen<sup>1</sup>, Raphael Niklaus Sieber<sup>4</sup>, Marc  
6 Stegger<sup>4</sup>, Francisco Fernando Calvo Artavia<sup>5</sup>, Esben Rahbek Thuesen<sup>2,3</sup>, Marlies Jilles  
7 Francine Goedknecht<sup>2</sup>, Louise Lohse<sup>1</sup>, Sten Mortensen<sup>5</sup>, Anders Fomsgaard<sup>1</sup>, Anette  
8 Boklund<sup>6</sup>, Anette Bøtner<sup>6</sup>, Graham J. Belsham<sup>6\*</sup>

9

10 1: Department of Virus & Microbiological Special Diagnostics, Statens Serum Institut,  
11 Artillerivej 5, DK-2300 Copenhagen S, Denmark

12 2: Department of Health Technology, Section for Bioinformatics, Technical University of  
13 Denmark, DK-2800 Kgs. Lyngby, Denmark

14 3: PandemiX Center, Department of Science and Environment, Roskilde University, DK-  
15 4000 Roskilde, Denmark

16 4: Department of Bacteria, Parasites and Fungi, Statens Serum Institut, Artillerivej 5, DK-  
17 2300 Copenhagen S, Denmark

18 5: Danish Veterinary and Food Administration, Ministry of Environment and Food, DK-2600  
19 Glostrup, Denmark

20 6: Department of Veterinary and Animal Sciences, University of Copenhagen, DK-1860  
21 Frederiksberg C, Denmark

22

23 **Short title:** Evolution of SARS-CoV-2 in mink and humans in Denmark during 2020.

24 **Corresponding authors:** Thomas Bruun Rasmussen ([tbru@ssi.dk](mailto:tbru@ssi.dk)) and Graham J. Belsham

25 ([grbe@sund.ku.dk](mailto:grbe@sund.ku.dk))

26 **Abstract**

27 The severe acute respiratory syndrome coronavirus-2 (SARS-CoV-2) has not only caused the  
28 COVID-19 pandemic but also had a major impact on farmed mink production in several  
29 European countries. In Denmark, the entire population of farmed mink (over 15 million  
30 animals) was culled in late 2020. During the period of June to November 2020, mink on 290  
31 farms (out of about 1100 in the country) were shown to be infected with SARS-CoV-2.  
32 Genome sequencing identified changes in the virus within the mink and it is estimated that  
33 about 4000 people in Denmark became infected with these mink virus variants. Phylogenetic  
34 analysis revealed the generation of multiple clusters of the virus within the mink. A detailed  
35 analysis of the changes in the virus during replication in mink and, in parallel, in the human  
36 population in Denmark, during the same time period, has been performed here. The majority  
37 of cases in mink involved variants that had the Y435F substitution and the H69/V70 deletion  
38 within the Spike (S) protein; these changes emerged early on during the outbreak. However,  
39 further introductions of the virus, with variants lacking these changes, from the human  
40 population into mink also occurred. Based on phylogenetic analysis of the available viral  
41 genome data, we estimate that there were a minimum of about 17 separate examples of mink  
42 to human transmission of the virus in Denmark, using a conservative approach, but up to 60  
43 such events (95% credible interval: (35-77)) were identified using parsimony to count cross-  
44 species jumps on transmission trees inferred using a Bayesian method. Using the latter  
45 approach, it was estimated that there were 136 jumps (95% credible interval: (112-164)) from

46 humans to mink. Thus, transmission of these viruses from humans to mink, mink to mink,  
47 from mink to humans and between humans were all observed. (296 words)

#### 48 **Author summary**

49 In addition to causing a pandemic in the human population, SARS-CoV-2 also infected  
50 farmed mink. In Denmark, after the first identification of infection in mink during June 2020,  
51 a decision was made in November 2020 to cull all the farmed mink. Within this outbreak,  
52 mink on 290 farms (out of about 1100 in the country) were found to have been infected. We  
53 showed, by analysis of the viruses from the mink, that the viruses on the farms were mainly  
54 of three different, but closely related, types (termed Clusters 2, 3 and 4) that shared certain  
55 distinctive features. Thus, we found that many outbreaks in mink resulted from transmission  
56 of the virus between mink farms. However, we identified that new introductions of other  
57 virus variants, presumably from infected humans, also occurred. Furthermore, we showed  
58 that spread of the virus from infected mink to humans also happened on multiple occasions.  
59 Thus, transmission of these viruses from humans to mink, mink to mink, from mink to  
60 humans and between humans were all observed. (172 words)

61

62

63

64

#### 65 **Introduction**

66 The severe acute respiratory syndrome coronavirus-2 (SARS-CoV-2) has caused the  
67 COVID-19 pandemic [1], with over 675 million cases reported globally and it has contributed  
68 to the deaths of at least 6.8 million people [2]. The coronavirus (RaTG13), which has been  
69 found to be the most closely related to SARS-CoV-2, was detected in horseshoe bats  
70 (*Rhinolophus affinis*) in China [3], with about 1200 nucleotide (nt) differences between their

71 full-length RNA genomes of about 30,000 nt (ca. 96% identity). It is not known how the  
72 virus moved from these bats to humans or if there was an intermediate host [4, 5], as with  
73 civet cats for the SARS-CoV [6]. In addition to the effect of the continuing pandemic in  
74 humans, the same virus has also had a drastic impact on farmed mink production worldwide.  
75 Outbreaks of disease on mink farms, caused by infection with SARS-CoV-2, were initially  
76 identified, during April 2020, in the Netherlands (NL) [7]. These were followed closely (from  
77 June 2020) by outbreaks in Denmark (DK) [8], a country with one of the highest levels  
78 (about 40%) of global mink production, involving at that time over 1100 farms and a  
79 population of about 17 million mink [9]. Spread of SARS-CoV-2 into mink was also  
80 observed in a variety of other countries, including Canada, France, Greece, Italy, Lithuania,  
81 Spain, Sweden and the USA [10].

82 In total, SARS-CoV-2 infections were detected on 290 mink farm premises in DK (ca.  
83 25% of the total) and this contributed to the Danish government's decision in early November  
84 2020 to stop all mink production within DK [11]. The entire mink population was culled [9]  
85 and mink production halted until the end of 2022. The production of mink in the NL was also  
86 stopped in 2020, bringing forward an earlier planned end to this industry [12].

87 During the course of the outbreaks in mink in DK, a large number of different virus  
88 variants were observed. However, most of the viruses from mink that were analyzed had a  
89 specific mutation (A22920T) within the gene encoding the Spike (S) protein, resulting in the  
90 conservative amino acid substitution Y453F (tyrosine to phenylalanine), which occurred on  
91 the first mink farm found to have infected animals in DK [8]. This mutation was one of the  
92 defining changes that lead to the emergence of the virus pangolin lineage termed B.1.1.298  
93 within the European Clade 20B. This same change was seen on one mink farm in the NL,  
94 early in the outbreak there, but also later in other mink farms [7, 13]. However, these  
95 variants, belonged to two different clades, 19A and 20A, and did not predominate in the NL.

96 The residue Y453 lies within the receptor binding domain (RBD) of the S protein that is  
97 known to interact with the cellular receptor, angiotensin-converting enzyme 2 (ACE2), which  
98 is used by the virus [14]. It has been reported that the Y453F substitution enhances binding of  
99 the virus to the mink ACE2 protein without compromising interaction with the human ACE2  
100 protein [15].

101 A second, early, change in the viruses circulating in the mink population was the  
102 deletion of six contiguous nucleotides in the S gene coding sequence, which resulted in the  
103 loss of two amino acid residues, H69 and V70 (termed H69/V70del), from the S protein [16].  
104 This change was first detected (in August 2020) on the 4<sup>th</sup> farm with infected mink in DK  
105 along with additional sequence changes, in other parts of the virus genome (including  
106 nucleotide changes leading to the amino acid substitutions P3395S in ORF1a and S2430I in  
107 ORF1b).

108 After the appearance of the Y453 and H69/V70del variants in mink, viruses with  
109 these changes were also found in the human population in the same region of DK, namely  
110 Northern Denmark [8, 11]. In total, the mink variants of SARS-CoV-2 were detected in over  
111 1,100 people in DK out of 53,933 sequenced samples during the period from June 2020 to  
112 January 2021 [17] and this incidence was used to estimate that about 4000 humans in DK  
113 became infected with mink-derived viruses [11]. In Northern Denmark, where most SARS-  
114 CoV-2 outbreaks in mink occurred, amongst the people connected to mink farms, about 30%  
115 tested positive for SARS-CoV-2 in the period from June to November 2020 and  
116 approximately 27% of the SARS-CoV-2 samples from humans in this community were mink-  
117 associated [11].

118 During August and September 2020, mink on substantially more farms tested positive  
119 for SARS-CoV-2 [9]. This was coincident with extensive community spread of the virus [11]  
120 and further sequence changes generating multiple discrete clusters of viruses (termed Clusters

121 2, 3, 4 and 5) within the mink phylogeny (Figure 1). There was particular concern about a  
122 Cluster 5 isolate (named hCoV-19/Denmark/DCGC-3024/2020, GISAID EPI\_ISL\_616802),  
123 which had a number of amino acid sequence changes in the S protein (Y453F, I692V and  
124 M1229I as well as the H69/V70del). Preliminary testing of this virus isolate suggested a  
125 possible decrease in neutralization of this virus variant by human antibodies [18]. However,  
126 further analysis [19] showed that the impact of these changes on the ability of this virus to be  
127 neutralized by antibodies from convalescent humans was generally rather limited. Similarly,  
128 it has been found that there was very little loss of neutralization of pseudoviruses carrying a  
129 Cluster 5-like S protein, compared to wild-type, by sera from people twice vaccinated with  
130 Pfizer or Moderna mRNA vaccines [20].

131 In the current study, the genomic sequences of viruses from nearly all known infected  
132 mink farm premises in DK have been analyzed together with the sequences of the viruses  
133 circulating in the human population in DK during the same time period. This sheds light on  
134 the spread and evolution of the virus within mink and also describes many occasions when  
135 the virus was transmitted from humans to mink, as well as *vice-versa*.

136

## 137 **Results**

### 138 *Appearance of multiple clusters of SARS-CoV-2 in mink*

139 After the initial cases (starting in June 2020) of SARS-CoV-2 infection on four mink  
140 farms in DK [8, 16], there was further spread of the virus to other farms (Figure 1, Table 1).  
141 Outbreaks initially occurred within Northern Denmark but spread into Central and Southern  
142 Denmark (Figure 2). The virus variants found in mink in DK, during August and September  
143 2020, all belonged to the same pangolin lineage, B.1.1.298, as for the initial cases, and were  
144 most likely descendants from the virus identified in the mink population in June. They all had  
145 the Y453F substitution in the S protein that was first observed on farm 1 [8]. It should be

146 noted that from farm 1 onwards, each farm with infected mink was numbered consecutively  
147 following detection of SARS-CoV-2 on the farm. The SARS-CoV-2 in DK at that time, in  
148 both humans and mink, all had the A23403G change (encoding the substitution D614G  
149 within the S protein) compared to the Wuhan strain and this change is not considered further.

150 Additional mutations emerged within the infected mink. Whole-genome-based  
151 phylogenetic analysis, using the maximum-likelihood method, performed on 698 sequences  
152 from infected mink (from nearly all the affected farms in DK), showed a segregation of the  
153 viruses from the initial cases into four major clusters (termed Clusters 2, 3, 4 and 5)  
154 indicating multiple transmission pathways (Figure 1 and Supplementary Figure 1). A circular  
155 representation of the phylogenetic tree clearly shows the general dominance of Clusters 2, 3  
156 and 4 within this epidemic (Figure 1), but sequencing was only performed on a small subset  
157 of the infected mink, thus the precise proportions of mink infected with each variant is not  
158 known. A rectangular version of the phylogenetic tree based on the same set of virus  
159 sequences, but including sequence IDs and farm numbers, is shown in Supplementary Figure  
160 S1.

161 Viruses present on farms 1-4 [16], represent parental sequences to Clusters 2, 3, 4 and  
162 5 (Supplementary Figure S1). In total, 270 of the 290 farms (i.e. 93%) that were tested  
163 positive for SARS-CoV-2 by the end of November had mink infected with variants of lineage  
164 B.1.1.298. Cluster 4 was the most common virus variant found amongst these outbreaks  
165 (Figure 1) and was detected on 121 farms, while Cluster 2 and Cluster 3 viruses were found  
166 on 76 and 66 farms, respectively (note, some farms had viruses from more than one cluster  
167 present, see Supplementary Figure S1). In contrast, the Cluster 5 variant was only observed in  
168 mink from five farms in Northern Denmark (Table 1 and Figure 2A) and only during the first  
169 part of September 2020, whereas the other Clusters persisted until the culling of all mink in

170 DK that ended in late November (Table 1). Further details of the various Clusters are  
171 described in Supplementary Information file S1.

172 The mink variant viruses with Y453F (within lineage B.1.1.298 including Clusters 2,  
173 3, 4 and 5) clearly made up the majority of the variants found on Danish mink farms during  
174 the mink epidemic (Figure 1). However, new introductions of SARS-CoV-2 into mink also  
175 occurred, which lead to the C1-C8 variant groups. These new introductions occurred in  
176 multiple locations within Northern, Central and Southern Denmark (Figure 2B). These  
177 viruses are clearly distinct from the majority of those that infected the mink. For example, the  
178 viruses in C1-C8 lack the Y453F substitution in the S protein and they do not belong to the  
179 B.1.1.298 lineage. In total, mink on eighteen farms were infected with SARS-CoV-2 lineage  
180 variants other than B.1.1.298. These individual independent introductions are described in  
181 more detail in Supplementary Information file S2.

#### 182 *Evolution of SARS-CoV-2 in mink and humans*

183 In order to investigate the evolution of SARS-CoV-2 in mink and in humans within  
184 DK, the sequences of the viruses from both hosts were compared. The full-genome sequences  
185 of SARS-CoV-2 from samples collected from Danish mink were collected from GISAID [21]  
186 and low-quality sequences (i.e. with more than 10 unresolved nucleotides) were removed.  
187 Sequences from humans in DK, circulating at the same time, were also retrieved. For each of  
188 the datasets, identical or nearly identical sequences were also removed (see Materials and  
189 Methods). The final data set comprised 258 sequences from mink on 129 farms and 497  
190 sequences from humans across DK. These were aligned to the Wuhan-Hu-1 reference  
191 genome (GenBank accession no. NC\_045512) as described, and a phylogenetic tree,  
192 including the mink and human viruses, was constructed (Figure 3). It is apparent that there  
193 was considerable heterogeneity among both the mink and human sequences in DK during this  
194 period. Furthermore, it can be seen that sequences derived from mink and human hosts are



195 interspersed on the tree, indicating multiple cross-species transmission events occurred  
196 (Figure 3).

197 *Evolution and spread of mink-derived virus variants*

198 At the time of the first introduction of SARS-CoV-2 into farm 1, in Northern  
199 Denmark (Figure 2A), the amino acid substitution Y453F, in the receptor-binding domain of  
200 the S protein (resulting from the mutation A22920T), had not been seen anywhere else  
201 (globally) except in mink from one of the infected mink farms in the NL. In this case, the  
202 substitution was in a different clade (19A) of SARS-CoV-2 [7, 8], so this finding did not  
203 indicate a connection between the outbreaks in DK and in the NL. Virus from the person  
204 connected to farm 1 in DK, who is presumed to be the source of the outbreak in mink, did not  
205 have this mutation in the spike protein gene. Indeed, the viruses from mink on farm 1 varied  
206 at this position, some had the A22920T mutation (resulting in the Y453F substitution)  
207 whereas others lacked this change [8] (Figure 1). Phylogenetic analysis based on whole-  
208 genome SARS-CoV-2 sequences from both mink and human hosts, also clearly showed that  
209 the Y453F substitution evolved only once (among mink on farm 1) and then spread, with all  
210 descendant mink- and human-derived sequences retaining this mutation (Figure 3 and 4).

211 The deletion of residues H69/V70 in the S protein, on the other hand, appears to have  
212 evolved up to 5 times independently among the human and mink viruses analyzed here  
213 (Figures 5 and 6). One of these events occurred among the group of viruses in the mink that  
214 already had the Y453F substitution. The H69/V70del modification, as well as two other  
215 deletions in ORF1a, were observed for the first time on farm 4 [16]. Specifically, and based  
216 on the clock-tree reconstructed using BEAST 2, the deletion resulting in the H69/V70del  
217 change evolved about 2-7 weeks after the appearance of the Y453F variant (Supplementary  
218 Figure S2). This is consistent with a previous analysis, which showed that deletion of  
219 H69/V70 from the S protein increases virus infectivity and compensates for an infectivity

220 defect resulting from the RBD-substitutions N439K and Y453F [22]. All viruses, in the clade  
221 descending from this event, inherited this deletion, which was, therefore, present in the vast  
222 majority of the mink-derived viruses analyzed here.

223         Among viruses, which do not have the Y453F substitution, the H69/V70 deletion  
224 appeared again in 4 separate locations on the phylogeny (Figures 5 and 6). Two of these are  
225 singleton human sequences, that are basal to the Danish sequences, and they may, therefore,  
226 represent separate introductions rather than cases where the deletion evolved among Danish  
227 viruses. In addition to these single leaves, there are two clades, within the non-Y453F part of  
228 the tree, where multiple related sequences all have the deletion (Figure 6). It appears that the  
229 deletion evolved independently among Danish viruses in these two cases, and then spread.  
230 One of these clades contains 3 human sequences, while the other contains 1 mink-sequence  
231 and 4 human sequences indicating that virus with the deletion was transferred between  
232 humans and mink. In some of these viruses, the H69/V70 deletion was coupled with the  
233 N439K substitution in the S protein, which is also within the RBD, and where the deletion  
234 has also been reported to function as a compensatory change [22].

235

#### 236         *Inference of the number of cross-species transmissions in DK*

237         In previous studies, Wang et al. [23] defined criteria for identifying a cross-species  
238 transmission event for SARS-CoV-2 using a subset of Danish sequences. These criteria were:  
239 (1) that the direct two branches after the root of the clade have a different host; and (2) that  
240 the posterior probability of both branch and ancestral host for the root of the clade is  $>0.8$ . In  
241 the dataset used by Wang et al. [23], three independent cross-species transmission events  
242 were observed, all of which were caused by human-to-mink transmission. In addition, six  
243 SARS-CoV-2 sequences from humans were found to be very similar to mink-derived viral  
244 genomes, indicating they were most likely transmitted from mink to humans. However,

245 Wang et al. [23] could not determine, using their analyses, how many independent cross-  
246 species transmission events occurred due to the low posterior probabilities of the branches.

247 In order to further investigate the incidence of cross-species virus transmission events,  
248 the collected whole-genome sequences from DK (as described here) were used to infer the  
249 number of times that SARS-CoV-2 jumped from mink to humans (and *vice-versa*). Briefly,  
250 BEAST2 [24] was used to reconstruct clock model-based phylogenies. Then TransPhylo [25]  
251 was used to infer transmission trees based on the output from BEAST2, and finally the sumt  
252 and phylotree python packages [26,27] were used to analyze the transmission trees and  
253 count the likely number of zoonotic and reverse zoonotic jumps between the two species.  
254 This number was calculated using three different methods (see Materials & Methods). In  
255 method A, the number of inferred direct transmissions from an observed mink sequence to an  
256 observed human sequence were counted. Using this approach, it was estimated that there had  
257 been about 9 direct transmissions (posterior mean: 8.6; 95% credible interval: 6-11) from one  
258 of the 258 mink sequences included in the dataset, to one of the 497 human sequences. In  
259 method B, *indirect* transmissions were also inferred from an observed mink sequence, via an  
260 unobserved intermediate host, to an observed human sequence. Using this approach, it was  
261 estimated that there had been about 17 jumps (posterior mean: 17.3, 95% credible interval:  
262 14-21) from one of the mink to one of the humans in the data set. Using this same method,  
263 there were estimated to be about 18 jumps (posterior mean: 18.3; 95% credible interval: 14-  
264 21) from humans to mink. Finally, in method C, the number of cross-species jumps was  
265 estimated using a parsimony method applied to the TransPhylo output, including inferred  
266 unobserved mink and human hosts also. Using this approach, it was found that there had been  
267 about 60 jumps from mink to humans in DK during the investigated period (posterior mean:  
268 59.6; 95% credible interval: 35-77). The result of method B, about 17 jumps from mink to  
269 humans, can be considered as a fairly high-confidence, but conservative, estimate, i.e., it is

270 reasonably sure that the number of jumps is not less than this. However, since the virus from  
271 only a small proportion of the infected mink that were in DK during that time have been  
272 sequenced, it is almost certain that many interspecies jumps will be missed. The result from  
273 method C, i.e. about 60 jumps, may be argued to be probably closer to the real number as it  
274 represents a less conservative estimate. However, it comes with a greater uncertainty.

275         Using method C, a parsimony method applied to the TransPhylo output, it was  
276 estimated that there had also been about 136 jumps from humans to mink (posterior mean:  
277 135.5, 95% credible interval: 112-164). This fits fairly well with the 129 different mink  
278 farms, with infected mink, represented in our data set, since it is assumed that most of the  
279 virus introductions into the mink farms have occurred by independent human-to-mink  
280 transmission events (not by mink from one farm directly infecting mink at another farm).

281

## 282 **Discussion**

283         SARS-CoV-2 infection of farmed mink in DK contributed to the epidemic in humans  
284 in DK during 2020. The epidemic in mink was not being efficiently controlled by the  
285 measures taken (mink on 290 farms out of about 1100 in the country were found to have been  
286 infected) and it was decided to cull over 15 million mink. This resulted in the closure of the  
287 mink production industry until after the end of 2022. Most of the outbreaks in mink were  
288 caused by one of three different virus lineages, termed Clusters 2, 3 and 4, all of which  
289 belong to the pangolin lineage B.1.1.298 (Figure 1). These clusters shared some common  
290 features, namely the H69/V70del and Y453F changes, within the S protein. The deletion of  
291 H69/V70 has arisen independently in a variety of different lineages of SARS-CoV-2, both  
292 within mink and human variants. The deletion is associated with increased cleavage of the S  
293 protein and confers enhanced virus infectivity [22].

294 A virus isolate from Cluster 5, with additional amino acid changes, was the focus of  
295 considerable attention since preliminary studies indicated this isolate showed resistance to  
296 neutralization by antibodies from a small panel of convalescent human patients [18].  
297 However, in follow up studies [19], it was found that the antibodies from just 3 out of 44  
298 patient samples tested had a >3-fold reduction in virus neutralization titer against the Cluster  
299 5 virus isolate compared to a virus from early in the pandemic. Only one sample from the 44  
300 patients had a neutralization titer that was reduced by 4-fold or more [19]; the latter being the  
301 threshold set for defining neutralization resistance [28].

302 The Y453F substitution was found to have evolved only once in the mink in DK, on  
303 farm 1 [8]. This change was present in the majority of the sampled mink sequences (Figure 1  
304 and Suppl. Figure S1) and was also found in sequences from more than 1100 human cases in  
305 DK. It has been estimated that about 4000 humans have been infected with this variant [11].  
306 Thus the Y453F change clearly does not have a severely detrimental effect on the ability of  
307 the virus to infect humans [29]. However, viruses with this change were rapidly lost  
308 following the culling of all the mink (Table 1 and [11]). Cluster 5 viruses were not detected in  
309 mink or humans after mid-Sept. 2020 but viruses of the B.1.1.298 lineage (with the Y453F  
310 change) were detected in humans until January 2021 [17]. This suggests that viruses with the  
311 Y453F change did not have a selective advantage in humans at this time point. However, the  
312 generation of the Y453F variant (with the H69/V70del) in a patient with lymphoma has been  
313 reported [30], in a virus lineage separate from the mink viruses. As indicated above, the  
314 Y453F change only occurred once in mink in DK, on farm 1 [8], and was then retained in all  
315 descendant viruses analyzed here. However, it is notable that this change also has occurred  
316 independently in other mink virus sequences in the NL [7], Poland [31], the USA [32] and  
317 (based on sequences from GISAID [21]) in Lithuania and Latvia. All of these changes  
318 occurred in lineages other than B.1.1.298, indicating convergent evolution due to selective

319 advantages in mink. It should be noted that all but one sequence within the B.1.1.298 lineage  
320 originated from DK [21]. The single sequence from outside DK was found in a human  
321 sample collected in the Faroe Islands in September 2020.

322 In the lineage C4, which was first recognized in mid-October 2020 (i.e. shortly before  
323 the cull commenced) and lacks the Y453F change, another change, N501T, was detected on  
324 multiple farms (Supplementary Information file S2). Like the Y453F change, this substitution  
325 occurs at the interface between the ACE2 receptor and the S protein. Thus, it may achieve a  
326 similar effect [29]. It is notable that this change has also occurred in mink sequences from  
327 multiple countries and in different virus lineages as for the Y453F substitution (see above).

328 It is most likely that the initial introductions of SARS-CoV-2 into mink farms  
329 occurred from infected people. It is apparent that the virus, having acquired the Y453F  
330 change, then spread quickly and easily within the mink [8, 16]. Transmission from mink back  
331 into the human population clearly occurred too.

332 Assessing the extent of interspecies virus transmission is not simple, see Wang et al.  
333 [23]. Due to the many highly similar sequences, there will be several branches in the  
334 phylogenetic tree with poor support, and this causes what may be termed an entropic problem  
335 leading to an upward bias in the count of interspecies jumps [33]. If a set of, say, 5 mink  
336 sequences and 5 human sequences each have one unique mutation, then their pairwise  
337 distances will all be 2, and all the possible resolutions of this 10-leaf subtree will be equally  
338 likely. However, since there are many more possible subtrees where the 5 mink and 5 human  
339 leaves are intermingled, than there are possible subtrees where they are cleanly separated,  
340 then the average number of inferred jumps will be biased towards more than 1 inter-species  
341 jump, even though the data would also be consistent with only one zoonotic event. This  
342 means that ordinarily used methods for dealing with phylogenetic uncertainty, such as  
343 performing the computation on all or many trees from BEAST's posterior sample, will not

344 work (instead of getting a reliable posterior count, accounting for the uncertainty, the  
345 inclusion of less supported trees will create a bias for over-counting).

346 Here, we have used three different methods to assess interspecies virus transmission.  
347 Using method B, the analysis of the sequences indicated that at least 17 (95% credible  
348 interval: 14-21) different mink to human transmission events have happened in DK. This was  
349 estimated using a very conservative approach. Using an alternative method, based on  
350 analyzing the output from TransPhylo using parsimony (termed here method C), about 60  
351 jumps from mink to humans were estimated to have occurred. Furthermore, this methodology  
352 generated an estimate of 135 jumps from humans to mink. This number fits well with the 129  
353 farms represented in the data set that had infected mink. The transmission of the mink variant  
354 viruses from one mink farm to another occurred very efficiently. However, the mechanisms  
355 involved in this spread are not established [9]. In many cases, it may have been by human  
356 contacts with multiple mink farms but other routes are also possible. It is assumed that most  
357 of the introductions of the virus onto these mink farms have occurred by independent mink-  
358 to-human and then human-to-mink transmission events (not by mink from one farm infecting  
359 mink at another farm). Airborne transmission of the virus from mink farms to humans not  
360 connected to the farm seems unlikely, since the concentration of virus in the air outside of the  
361 mink farms appears to be low [9]. However, this topic deserves further study. The major  
362 proportion of the viruses that infected mink in DK had the Y453F substitution together with  
363 the H69/V70del in the S protein, including all of the viruses in Clusters 2, 3, 4 and 5 (Figure  
364 1). This suggests that, although new introductions of the virus from humans occurred (as with  
365 C1-C8), these were much less important for the total outbreak in mink than the mink farm to  
366 mink farm transmission. However, it is clearly not possible to know whether some of these  
367 virus variants would have become predominant among the mink if they had not been culled.  
368

369 *Concluding remarks*

370           It is apparent that SARS-CoV-2 readily infected farmed mink and spread quickly  
371 between farms. Transmission from infected humans to mink and from infected mink to  
372 humans occurred on multiple occasions and the mink-derived viruses then spread among  
373 people. There were legitimate concerns that replication of SARS-CoV-2 in a large population  
374 of mink could generate novel variants that would have adverse effects on human health due  
375 to antigenic change, greater transmissibility or higher fitness. However, mink-derived viruses  
376 with such unwelcome characteristics did not spread among humans before the mink  
377 population was culled. Variants of SARS-CoV-2 that did arise in mink (e.g. with the changes  
378 Y453F and H69/V70del in the S protein) were transmitted to, and within, the human  
379 population but died out either before, or soon after, the culling of the mink population in DK.

380

381

382 **Materials and Methods**

383 *Sequencing strategy*

384           Whole genome amplification of SARS-CoV-2 in mink and human samples was  
385 performed using a modified ARTIC tiled PCR protocol (see [34]) with amplicons ranging  
386 from 1000-1500 bp. A custom 2-step PCR with barcoding was applied to the amplicon  
387 libraries, then the libraries were normalized, pooled, and sequenced using Oxford Nanopore's  
388 SQK-LSK109 ligation kit on a MinION device with R.9.4.1 flowcells. The full protocol is  
389 available [35].

390

391 *Construction of maximum likelihood phylogenetic tree*

392           The maximum likelihood phylogeny of all 698 SARS-CoV-2 sequences from mink  
393 isolates was reconstructed using IQ-TREE version 2.0.3 [36] with a GTR model, based on the



394 alignment obtained by comparing each sequence to the Wuhan-Hu-1 reference genome  
395 (GenBank accession no. NC\_045512) using MAFFT version 7.475 [37] with option '--  
396 addfragments'. The phylogenetic tree was thereafter annotated using package ggtree in R  
397 version 4.2.1 [38]. Clusters 2-5 were derived from the initial cases (on farms 1-5) while the  
398 separate introductions that resulted in the C1-C8 variant groups were defined from a  
399 phylogeny based on human and mink sequences by picking the smallest possible  
400 monophyletic group containing one or more mink sequences.

401

#### 402 *Construction of Bayesian phylogenetic trees*

403 Whole-genome sequences of SARS-CoV-2 derived from infected farmed mink and  
404 humans in DK were collected from GISAID [21] on August 31<sup>st</sup> 2023. Sequences derived  
405 from mink were collected by searching for complete sequences passing GISAID's high  
406 coverage filter (allowing only entries with <1% Ns and <0.05% unique AA mutations) with a  
407 precise collection date. These gave rise to dataset 1; for this dataset, consisting of mink virus  
408 sequences, duplicate sequences derived from samples from the same farm on the same date  
409 were removed. Similarly, sequences derived from humans were collected by searching for  
410 complete sequences with a collection date between June 1<sup>st</sup> 2020 and February 28<sup>th</sup> 2021  
411 passing GISAID's high coverage filter. Two different datasets were constructed consisting of  
412 human virus sequences: dataset 2 with the amino acid substitution S:Y453F and dataset 3  
413 without the amino acid substitution S:Y453F. For datasets 2 and 3, duplicate sequences were  
414 removed if they were sampled on the same day. This was done to preserve the temporal  
415 signal in the data.

416 Sequences with more than 10 undetermined nucleotides were removed from the  
417 datasets, and the datasets were pre-processed by masking as described [39], removing  
418 sequences with more than 100 end gaps. Dataset 3 was further reduced to minimize the  
419 computational load using CD-HIT-EST from CD-HIT [40] to achieve a representative dataset

420 using a similarity threshold of 0.999. The three datasets were combined into one consisting of  
421 258 sequences from mink (derived from 129 mink farms), 49 sequences from humans  
422 without the S:Y453F substitution and 448 sequences from humans with the S:Y453F  
423 substitution. These sequences were aligned as described above.

424

#### 425 *Estimation of the number of zoonotic jumps from mink to human*

426 To determine transmission pathways, information from the phylogenies together with  
427 the relative sampling dates was combined. Phylogenetic trees were reconstructed using  
428 BEAST 2 [24]. The substitution model was GTR with empirical base frequencies and  
429 gamma-distributed rates with 4 discrete categories, combined with a strict molecular clock  
430 model calibrated by using the sequence sampling-dates, obtained from GISAID, to date the  
431 tips of the tree. The tree prior was the birth-death skyline serial model, with 10 dimensions  
432 for the reproductive number parameter, and one dimension for the sampling proportion [41].  
433 The model estimates a separate effective reproduction number for each of 10 equally large  
434 time-intervals covering the time-span from the root of the tree to the farthest tip. The prior for  
435 the becoming-uninfectious rate parameter was lognormal( $M=52.0$ ,  $S=1.25$ , mean in real  
436 space) per year, corresponding to a prior 95% credible interval of [1.3, 180] days for the  
437 duration of an infectious period. The prior for the clockrate was lognormal( $M=0.001$ ,  $S=1.25$ ,  
438 mean in real space) substitutions per site per year, corresponding to a 95% prior interval of  
439 [4.0E-5, 5.3E-3] substitutions per site per year. Both of these priors are weakly informative  
440 and help to regularize model fitting without imposing very strict constraints on the estimated  
441 values for these parameters. Other priors were left at their default values. Two parallel  
442 MCMC chains were run for 50 million iterations each with logging of trees and other  
443 parameters every 4000 iterations (for a total of 2 x 12,500 parameter samples). A burn-in of  
444 30% (15 million generations) was used. The software Tracer v1.7.2 [42] was used to analyze

445 parameter samples. Marginal posterior distributions from the two runs were essentially  
446 identical, indicating good convergence. Effective sample sizes for all parameters were well  
447 above 200, except for the following: posterior (ESS=166), likelihood (ESS=94), tree-length  
448 (ESS=136), BDSKY\_serial (ESS=138). The software phylotreeLib [26] and sumt [27] were  
449 used to analyze tree-samples, and to extract post-burnin trees and compute maximum clade  
450 credibility trees. Tree samples from the two independent runs were very similar, with average  
451 standard deviation of split frequencies (ASDSF) of 0.0125. The number of effective tree  
452 samples was estimated by first computing the log clade credibility for each tree-sample  
453 (based on clade frequencies from all post-burnin trees), and then using Tracer to compute  
454 ESS from this proxy measure [43]. Computed this way, the tree-sample ESS was 287,  
455 indicating an acceptable number of independent tree samples in the posterior.

456         To infer transmission trees, the software TransPhylo v1.4.10 [25] was used. This takes  
457 as input a pre-computed, dated phylogeny, where leaves correspond to pathogens sampled  
458 from the known infected hosts. The main output is a transmission tree that indicates “who”  
459 infected “whom”, including the potential existence of unsampled individuals who may have  
460 acted as missing transmission intermediates. For input we used the maximum clade  
461 credibility (MCC) tree with common-ancestor depths. A further 28 other trees from  
462 BEAST2’s posterior samples were analyzed, chosen to cover a range of different log-clade  
463 credibility values. We also used common-ancestor depths to set the branch lengths of these  
464 trees. Before analyzing any of these trees, the original Wuhan sequence was removed from  
465 the tree with the aim of having a more homogeneous substitution process on the remaining  
466 branches for the TransPhylo analysis. The generation time distribution in TransPhylo was set  
467 to be gamma-distributed with shape-parameter=60 and scale-parameter=0.0004105. These  
468 parameters were chosen to match the posterior 95% credible interval, found in the BEAST-  
469 analysis, as closely as possible (6.86 to 11.4 days). The parameters were found using the

470 optimize.minimize function from the SciPy python package [44]. TransPhylo was run for 10  
471 million iterations, sampling every 2000 generations, and using a burnin of 50%. This gave a  
472 total of 2500 post-burnin samples of transmission trees and other parameters, for the MCC  
473 tree and for each of the 28 other trees from the BEAST posterior sample. For the TransPhylo  
474 run, we set updateOff.p=TRUE to allow estimation of the offspring distribution.  
475 Convergence was checked by inspecting trace plots and computing ESS.

476         The output from TransPhylo was further analyzed to estimate the number of times  
477 SARS-CoV-2 jumped between mink and humans. This was done by inspecting each of the  
478 72,500 posterior transmission-tree samples (i.e. 29 times 2500), and for each of them  
479 counting the number of jumps in three different ways. In method A: the inferred direct  
480 transmissions from an observed mink sequence to an observed human sequence were counted  
481 (i.e., cases where TransPhylo inferred that both the source and the target of a cross-species  
482 transmission event were included in the data set). In method B: the number of inferred  
483 *indirect* transmissions from an observed mink sequence to an observed human sequence were  
484 counted. Occasionally TransPhylo will infer transmission chains that include one or more  
485 unobserved links (e.g., mink -> unknown -> unknown -> human), and these, of course, also  
486 imply transmission of the virus from a mink to a human somewhere in that chain. In method  
487 C: a parsimony method was used to infer the minimum number of mink-to-human  
488 transmissions based on the posterior sample of the transmission trees inferred by TransPhylo.  
489 Specifically, the algorithm of Hartigan [45] was implemented in a version that allowed some  
490 internal nodes on the tree to be observed (i.e., their state sets are simply taken to be the  
491 observed host for that internal node).

492

493 *Pangolin lineage determination*

494 The Pangolin lineage for the individual variants has been determined by analysis of  
495 the mink sequences in the database PANGO lineages [46]. In addition, a search in the  
496 GISAID EpiCoV database [21] has been used for further analysis in order to examine the  
497 occurrence of selected variants in published mink sequences and human sequences. When  
498 describing the observed changes in the S protein, the change D614G (compared to the  
499 reference Wuhan strain) was omitted, as this change occurred very early in the pandemic and  
500 is present in all sequences during the period of interest.

501

502

### 503 **Author contributions**

504 Conceptualization: T.B.R., A.Bø., G.J.B.; Data curation: T.B.R., A.S.O.; Formal analysis:  
505 T.B.R., A.G.Q, A.G.P., M.J.F.G., J.F., M.R.; Funding acquisition: A.Bø., T.B.R., G.J.B.,  
506 A.G.P.; Investigation: T.B.R., R.N.S., M.S., L.L. A.Bo.; Methodology: R.N.S., M.S., A.G.Q.,  
507 A.G.P.; Resources: L.L., S.M. (study materials); Software: R.N.S., A.G.P., A.G.Q, ;  
508 Supervision: T.B.R., A.G.P., A.Bø.; Validation: T.B.R.; Visualization: T.B.R., A.G.Q.,  
509 F.F.C.A., M.J.F.G., E.R.T., R.N.S., A.G.P., A.Bo.; Writing- original draft preparation: G.J.B;  
510 Writing- review & editing: All authors.

### 511 **Acknowledgements**

512 We gratefully acknowledge all data contributors, i.e., the Authors and their Originating  
513 laboratories responsible for obtaining the specimens, and their Submitting laboratories for  
514 generating the genetic sequence and metadata and sharing via the GISAID Initiative, on  
515 which this research is partially based. We thank Kåre Mølbak for helpful comments on an  
516 early draft of the manuscript.

517 This research was funded by the Danish Veterinary and Food Administration (FVST) as part  
518 of the agreement for commissioned work between the Danish Ministry of Food and

519 Agriculture and Fisheries and the University of Copenhagen and the Statens Serum Institut.

520 Further funding has been received from the Danish National Research Foundation (grant

521 number DNRF170 to A.G.P).

522

523

524 **References**

- 525 **1.** World Health Organization. <https://www.who.int/emergencies/diseases/novel->  
526 [coronavirus-2019](https://www.who.int/emergencies/diseases/novel-coronavirus-2019)
- 527 **2.** Johns Hopkins University. Coronavirus resource center <https://coronavirus.jhu.edu/>  
528 [accessed 2022 October 21]
- 529 **3.** Zhou P, Yang XL, Wang XG, Hu B, Zhang L, Zhang W, et al.. A pneumonia  
530 outbreak associated with a new coronavirus of probable bat origin. Nature. 2020;579:  
531 270-273. [doi: 10.1038/s41586-020-2012-7](https://doi.org/10.1038/s41586-020-2012-7).
- 532 **4.** Boni MF, Lemey P, Jiang X, Lam TT, Perry BW, Castoe TA, et al. Evolutionary  
533 origins of the SARS-CoV-2 sarbecovirus lineage responsible for the COVID-19  
534 pandemic. Nat Microbiol. 2020;5 :1408-1417. [doi: 10.1038/s41564-020-0771-4](https://doi.org/10.1038/s41564-020-0771-4).
- 535 **5.** Pekar JE, Magee A, Parker E, Moshiri N, Izhikevich K, Havens JL, et al. The  
536 molecular epidemiology of multiple zoonotic origins of SARS-CoV-2. Science.  
537 2022;377: 960-966. [doi: 10.1126/science.abp8337](https://doi.org/10.1126/science.abp8337).
- 538 **6.** Wang LF, Eaton BT. Bats, civets and the emergence of SARS. Curr Top Microbiol  
539 Immunol. 2007;315: 325-44. doi: 10.1007/978-3-540-70962-6\_13.
- 540 **7.** Oreshkova N, Molenaar RJ, Vreman S, Harders F, Oude Munnink BB, Hakze-van der  
541 Honing RW, et al. SARS-CoV-2 infection in farmed minks, the Netherlands, April  
542 and May 2020. Euro Surveill. 2020;25: 2001005. [doi: 10.2807/1560-](https://doi.org/10.2807/1560-7917.ES.2020.25.23.2001005)  
543 [7917.ES.2020.25.23.2001005](https://doi.org/10.2807/1560-7917.ES.2020.25.23.2001005)

- 544 **8.** Hammer AS, Quaade ML, Rasmussen TB, Fonager J, Rasmussen M, Mundbjerg K, et  
545 al. SARS-CoV-2 Transmission between Mink (Neovison vison) and Humans,  
546 Denmark. *Emerg Infect Dis.* 2021; 27: 547-551. doi: [10.3201/eid2702.203794](https://doi.org/10.3201/eid2702.203794).
- 547 **9.** Boklund A, Hammer AS, Quaade ML, Rasmussen TB, Lohse L, Strandbygaard B, et  
548 al. SARS-CoV-2 in Danish Mink Farms: Course of the Epidemic and a Descriptive  
549 Analysis of the Outbreaks in 2020. *Animals (Basel).* 2021;11:164. doi:  
550 [10.3390/ani11010164](https://doi.org/10.3390/ani11010164).
- 551 **10.** SARS-CoV-2 in animals used for fur farming. 2021.  
552 [https://www.woah.org/app/uploads/2021/03/glews-risk-assessment-fur-animals-sars-](https://www.woah.org/app/uploads/2021/03/glews-risk-assessment-fur-animals-sars-cov-2.pdf)  
553 [cov-2.pdf](https://www.woah.org/app/uploads/2021/03/glews-risk-assessment-fur-animals-sars-cov-2.pdf)
- 554 **11.** Larsen HD, Fonager J, Lomholt FK, Dalby T, Benedetti G, Kristensen B, et al.  
555 Preliminary report of an outbreak of SARS-CoV-2 in mink and mink farmers  
556 associated with community spread, Denmark, June to November 2020. *Euro Surveill.*  
557 2021;26: 2100009. doi: [10.2807/1560-7917.ES.2021.26.5.210009](https://doi.org/10.2807/1560-7917.ES.2021.26.5.210009).
- 558 **12.** <https://promedmail.org/promed-post/?id=7994061>.
- 559 **13.** Oude Munnink BB, Sikkema RS, Nieuwenhuijse DF, Molenaar RJ, Munger E,  
560 Molenkamp R, et al. Transmission of SARS-CoV-2 on mink farms between humans  
561 and mink and back to humans. *Science.* 2021;371: 172-177. doi:  
562 [10.1126/science.abe5901](https://doi.org/10.1126/science.abe5901).
- 563 **14.** Yan R, Zhang Y, Li Y, Xia L, Guo Y, Zhou Q. Structural basis for the recognition of  
564 SARS-CoV-2 by full-length human ACE2. *Science.* 2020;367: 1444-1448. doi:  
565 [10.1126/science.abb2762](https://doi.org/10.1126/science.abb2762).



- 566 **15.** Ren W, Lan J, Ju X, Gong M, Long Q, Zhu Z, et al. Mutation Y453F in the spike  
567 protein of SARS-CoV-2 enhances interaction with the mink ACE2 receptor for host  
568 adaption. PLoS Pathog. 2021;17: e1010053. [doi: 10.1371/journal.ppat.1010053](https://doi.org/10.1371/journal.ppat.1010053).
- 569 **16.** Rasmussen TB, Fonager J, Jørgensen CS, Lassaunière R, Hammer AS, Quaade ML,  
570 et al. Infection, recovery and re-infection of farmed mink with SARS-CoV-2. PLoS  
571 Pathog. 2021;17: e1010068. [doi: 10.1371/journal.ppat.1010068](https://doi.org/10.1371/journal.ppat.1010068).
- 572 **17.** <https://www.covid19genomics.dk/statistics>
- 573 **18.** Lassaunière R, Fonager J, Rasmussen M, Frische A, Polacek Strandh C, Rasmussen  
574 TB, et al. SARS-CoV-2 Spike Mutations Arising in Danish Mink and Their Spread to  
575 Humans. København: Statens Serum Institut. 2020. . [https://files.ssi.dk/Mink-cluster-](https://files.ssi.dk/Mink-cluster-5-short-report_AFO2)  
576 [5-short-report\\_AFO2](https://files.ssi.dk/Mink-cluster-5-short-report_AFO2)
- 577 **19.** Lassaunière R, Fonager J, Rasmussen M, Frische A, Polacek C, Rasmussen TB, et  
578 al. *In vitro* Characterization of Fitness and Convalescent Antibody Neutralization of  
579 SARS-CoV-2 Cluster 5 Variant Emerging in Mink at Danish Farms. Front Microbiol.  
580 2021;12: 698944. [doi: 10.3389/fmicb.2021.698944](https://doi.org/10.3389/fmicb.2021.698944).
- 581 **20.** Garcia-Beltran WF, Lam EC, St Denis K, Nitido AD, Garcia ZH, Hauser BM, et al.  
582 Multiple SARS-CoV-2 variants escape neutralization by vaccine-induced humoral  
583 immunity. Cell. 2021;184: 2372-2383.e9. [doi: 10.1016/j.cell.2021.03.013](https://doi.org/10.1016/j.cell.2021.03.013).
- 584 **21.** Shu, Y. and McCauley, J. GISAID: from vision to reality. Euro Surveill. 2017; 22:13  
585 [doi: 10.2807/1560-7917.ES.2017.22.13.30494](https://doi.org/10.2807/1560-7917.ES.2017.22.13.30494)
- 586 **22.** Meng B, Kemp SA, Papa G, Datir R, Ferreira IATM, Marelli S, et al. Recurrent  
587 emergence of SARS-CoV-2 spike deletion H69/V70 and its role in the Alpha variant  
588 B.1.1.7. Cell Rep. 2021;35: 109292. [doi: 10.1016/j.celrep.2021.109292](https://doi.org/10.1016/j.celrep.2021.109292).
- 589

- 590 **23.** Wang L, Didelot X, Bi Y, Gao GF. Assessing the extent of community spread caused  
591 by mink-derived SARS-CoV-2 variants. *Innovation (Camb)*. 2021; 2(3):100128. doi:  
592 10.1016/j.xinn.2021.100128.
- 593 **24.** Bouckaert R., Heled J., Kühnert D., Vaughan T., Wu C-H., Xie D., Suchard MA.,  
594 Rambaut A., Drummond A. J. BEAST 2: A Software Platform for Bayesian  
595 Evolutionary Analysis. *PLoS Computational Biology*. 2014; 10(4): e1003537.  
596 doi:10.1371/journal.pcbi.1003537
- 597 **25.** Didelot X, Fraser C, Gardy J, Colijn C. Genomic Infectious Disease Epidemiology in  
598 Partially Sampled and Ongoing Outbreaks. *Mol Biol Evol*. 2017; 34(4):997-1007. doi:  
599 10.1093/molbev/msw275.
- 600 **26.** Pedersen A.G. phylotree: a python library for analyzing and manipulating  
601 phylogenetic trees (Version 1.27.0) [Computer software]. 2023.  
602 <https://doi.org/10.5281/zenodo.10148565>
- 603 **27.** Pedersen, A.G. sumt: a command-line program for computing consensus trees and  
604 other phylogenetic tree summaries (Version 3.8.1) [Computer software]. 2023.  
605 <https://doi.org/10.5281/zenodo.10148693>
- 606 **28.** Li Q, Wu J, Nie J, Zhang L, Hao H, Liu S, et al. The Impact of Mutations in SARS-  
607 CoV-2 Spike on Viral Infectivity and Antigenicity. *Cell*. 2020;182: 1284-1294.e9.  
608 [doi: 10.1016/j.cell.2020.07.012](https://doi.org/10.1016/j.cell.2020.07.012).
- 609 **29.** Zhou J, Peacock TP, Brown JC, Goldhill DH, Elrefaey AME, Penrice-Randal R. et al.  
610 Mutations that adapt SARS-CoV-2 to mink or ferret do not increase fitness in the  
611 human airway. *Cell Rep*. 2022;38:110344. doi: 10.1016/j.celrep.2022.110344.
- 612 **30.** Stanevich OV, Alekseeva EI, Sergeeva M, Fadeev AV, Komissarova KS, Ivanova AA  
613 et al. SARS-CoV-2 escape from cytotoxic T cells during long-term COVID-19. *Nat*  
614 *Commun*. 2023;14(1):149. doi: 10.1038/s41467-022-34033-x.

- 615 **31.** Domańska-Blicharz K, Orłowska A, Smreczak M, Niemczuk K, et al. Mink SARS-  
616 CoV-2 Infection in Poland - Short Communication. *J Vet Res.* 2021;65: 1-5. doi:  
617 10.2478/jvetres-2021-0017.
- 618 **32.** Cossaboom CM, Wendling NM, Lewis NM, Rettler H, Harvey RR, et al. One Health  
619 Investigation of SARS-CoV-2 in People and Animals on Multiple Mink Farms in  
620 Utah. *Viruses.* 2022;15: 96. doi: 10.3390/v15010096.
- 621 **33.** Duchêne S, Lanfear R. Phylogenetic uncertainty can bias the number of evolutionary  
622 transitions estimated from ancestral state reconstruction methods. *J Exp Zool B Mol*  
623 *Dev Evol.* 2015;324(6): 517-524. doi: 10.1002/jez.b.22638.
- 624 **34.** Quick J. nCoV-2019 sequencing protocol V.1. 2020.  
625 [dx.doi.org/10.17504/protocols.io/bbmuik6w](https://doi.org/10.17504/protocols.io/bbmuik6w)
- 626 **35.** Sørensen EA, Karst SM, Knutsson S. AAU-nCoV-2019 tailed long amplicon  
627 sequencing. protocols.io; 2020. [.dx.doi.org/10.17504/protocols.io/bfc3jiyn](https://doi.org/10.17504/protocols.io/bfc3jiyn)
- 628 **36.** Nguyen L-T, Schmidt HA, von Haeseler A, Minh BQ. IQ-TREE: A Fast and  
629 Effective Stochastic Algorithm for Estimating Maximum-Likelihood  
630 Phylogenies, *Molecular Biology and Evolution.*2015;32:268–274.  
631 <https://doi.org/10.1093/molbev/msu300>
- 632 **37.** Katoh K, Standley DM. MAFFT Multiple Sequence Alignment Software Version 7:  
633 Improvements in Performance and Usability, *Molecular Biology and*  
634 *Evolution.*2013;30: 772–780. <https://doi.org/10.1093/molbev/mst010>
- 635 **38.** Yu G, Smith DK, Zhu H, Guan Y, Lam TT.-Y. ggtree: an r package for visualization  
636 and annotation of phylogenetic trees with their covariates and other associated data.  
637 *Methods Ecol Evol.* 2017; 8: 28-36. <https://doi.org/10.1111/2041-210X.12628>

- 638 **39.** De Maio N, Walker C, Borges R, Weilguny L, Slodkowitz G et al. Masking strategies  
639 for SARS-CoV-2 alignments, 2020. [https://virological.org/t/masking-strategies-for-](https://virological.org/t/masking-strategies-for-sars-cov-2-alignments/480)  
640 [sars-cov-2-alignments/480](https://virological.org/t/masking-strategies-for-sars-cov-2-alignments/480)
- 641 **40.** Li W, Godzik A. Cd-hit: a fast program for clustering and comparing large sets of  
642 protein or nucleotide sequences. *Bioinformatics*. 2006; 22: 1658–1659.
- 643 **41.** Stadler T, Kühnert D, Bonhoeffer S, Drummond AJ. Birth-death skyline plot reveals  
644 temporal changes of epidemic spread in HIV and hepatitis C virus (HCV). *Proc Natl*  
645 *Acad Sci USA*. 2013;110(1):228-33. doi: 10.1073/pnas.1207965110.
- 646 **42.** Rambaut A, Drummond AJ, Xie D, Baele G and Suchard MA. Posterior  
647 summarisation in Bayesian phylogenetics using Tracer 1.7. *Systematic Biology*. 2018;  
648 syy032. [doi:10.1093/sysbio/syy032](https://doi.org/10.1093/sysbio/syy032)
- 649 **43.** Lanfear R, Hua X, Warren DL. Estimating the Effective Sample Size of Tree  
650 Topologies from Bayesian Phylogenetic Analyses. *Genome Biol Evol*. 2016 Aug  
651 16;8(8):2319-32. doi: 10.1093/gbe/evw171.
- 652 **44.** Virtanen P, Gommers R, Oliphant TE, Haberland M, Reddy T, Cournapeau D, et al.  
653 SciPy 1.0 Contributors. SciPy 1.0: fundamental algorithms for scientific computing in  
654 Python. *Nat Methods*. 2020; 17(3): 261-272. doi: 10.1038/s41592-019-0686-2.
- 655 **45.** Hartigan, JA. Minimum mutation fits to a given tree. *Biometrics* 1973; 29, 53.
- 656 **46.** Rambaut A, Holmes EC, O’Toole Á, Hill V, McCrone JT, Ruis C, et al. A dynamic  
657 nomenclature proposal for SARS-CoV-2 lineages to assist genomic  
658 epidemiology. *Nat Microbiol*. 2020; 5: 1403–1407. [https://doi.org/10.1038/s41564-](https://doi.org/10.1038/s41564-020-0770-5)  
659 [020-0770-5](https://doi.org/10.1038/s41564-020-0770-5)
- 660
- 661

662

663

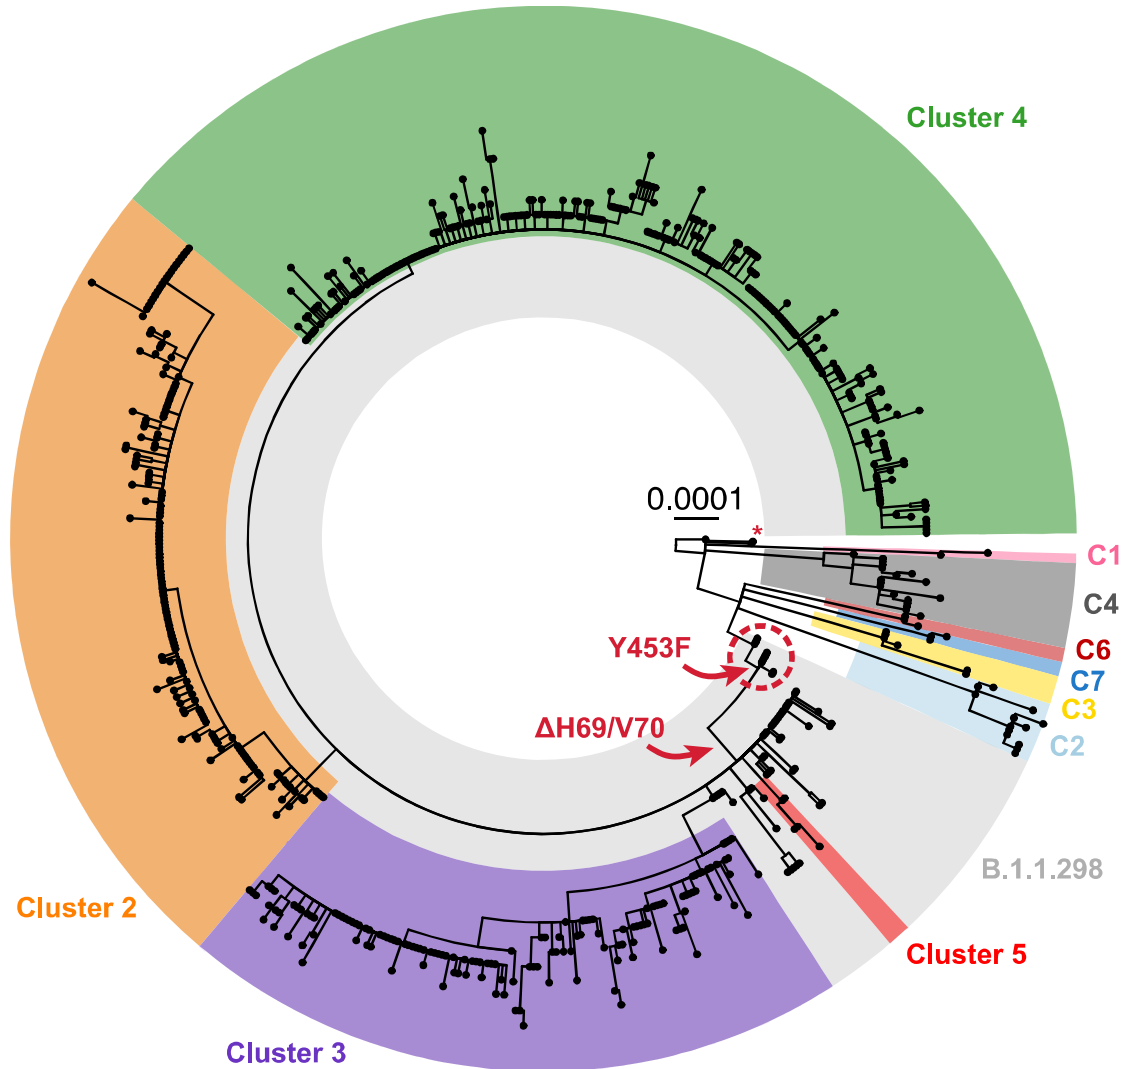

664

665 **Figure 1. Phylogeny of the 698 SARS-CoV-2 whole-genome sequences from Danish**  
666 **mink.** The majority of viruses found on infected farms, including those from the initial cases  
667 (farms 1-3, indicated within a red dashed circle) and viruses in Clusters 2-5, belong to  
668 pangolin lineage B.1.1.298 and are highlighted in light grey. Clusters 2-5 and viruses  
669 subsequently found as further spillovers from humans (C1-C4 and C6-C7) are highlighted in  
670 different colours. A singleton sequence belonging to C8 is indicated by a red asterisk. The  
671 occurrence of key sequence changes that were present in most mink virus sequences are  
672 indicated with red arrows. The scale bar indicates number of substitutions per variable site.  
673 The phylogeny was rooted with the basal reference sequence (NC\_45512.1/EPI\_ISL\_406798,  
674 known as the Wuhan-Hu-1 virus) as the outgroup.

675

676

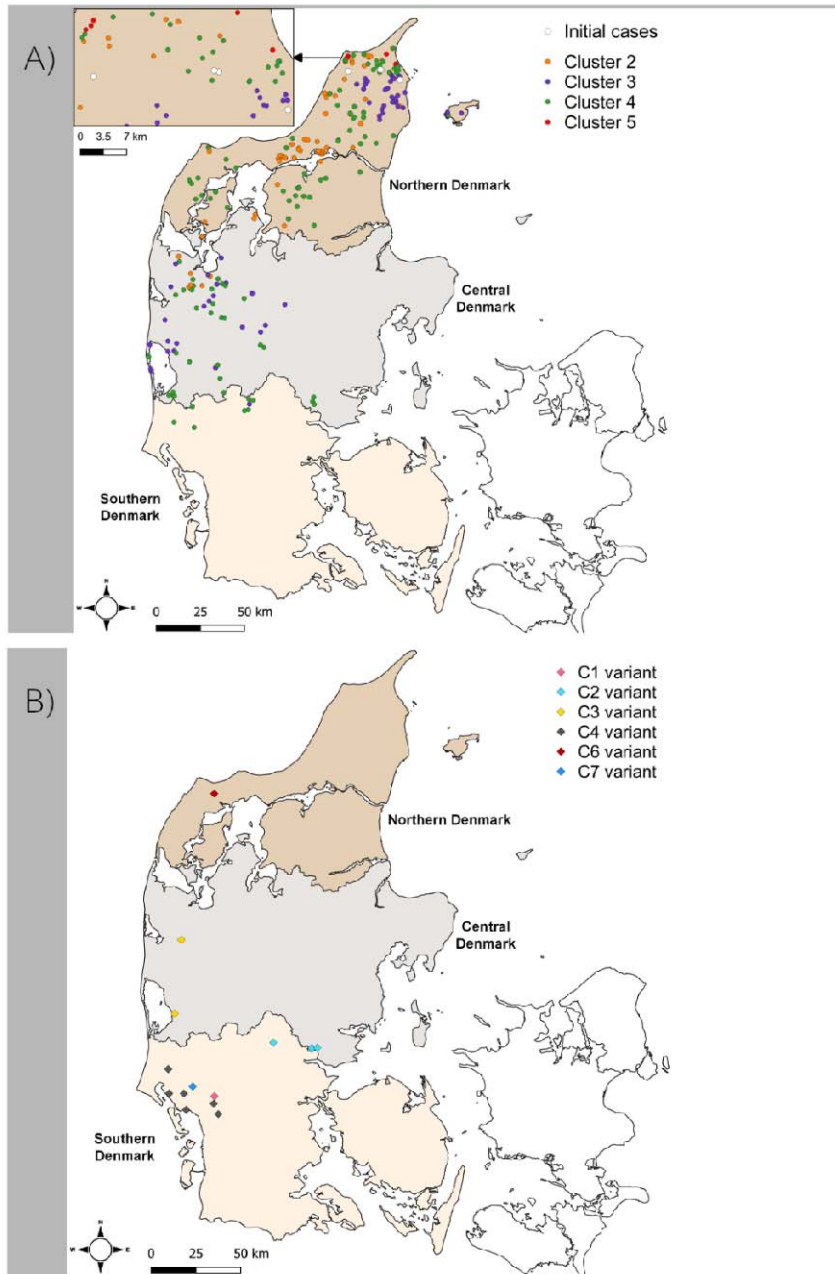

677

678 **Figure 2. Location of different SARS-CoV-2 variants in mink during the epidemic in**  
679 **Denmark, June-November 2020.** Panel A. The location of the initial cases of SARS-CoV-2  
680 infection in Northern Denmark are indicated. Subsequently, further cases occurred and the  
681 virus diverged, within lineage B.1.1.298, into Clusters 2, 3, 4 and 5 (as shown in Figure 1).  
682 Panel B. Later in the epidemic, new introductions of viruses from different lineages occurred  
683 and these are named as C1-C7 (see Table 1).

684

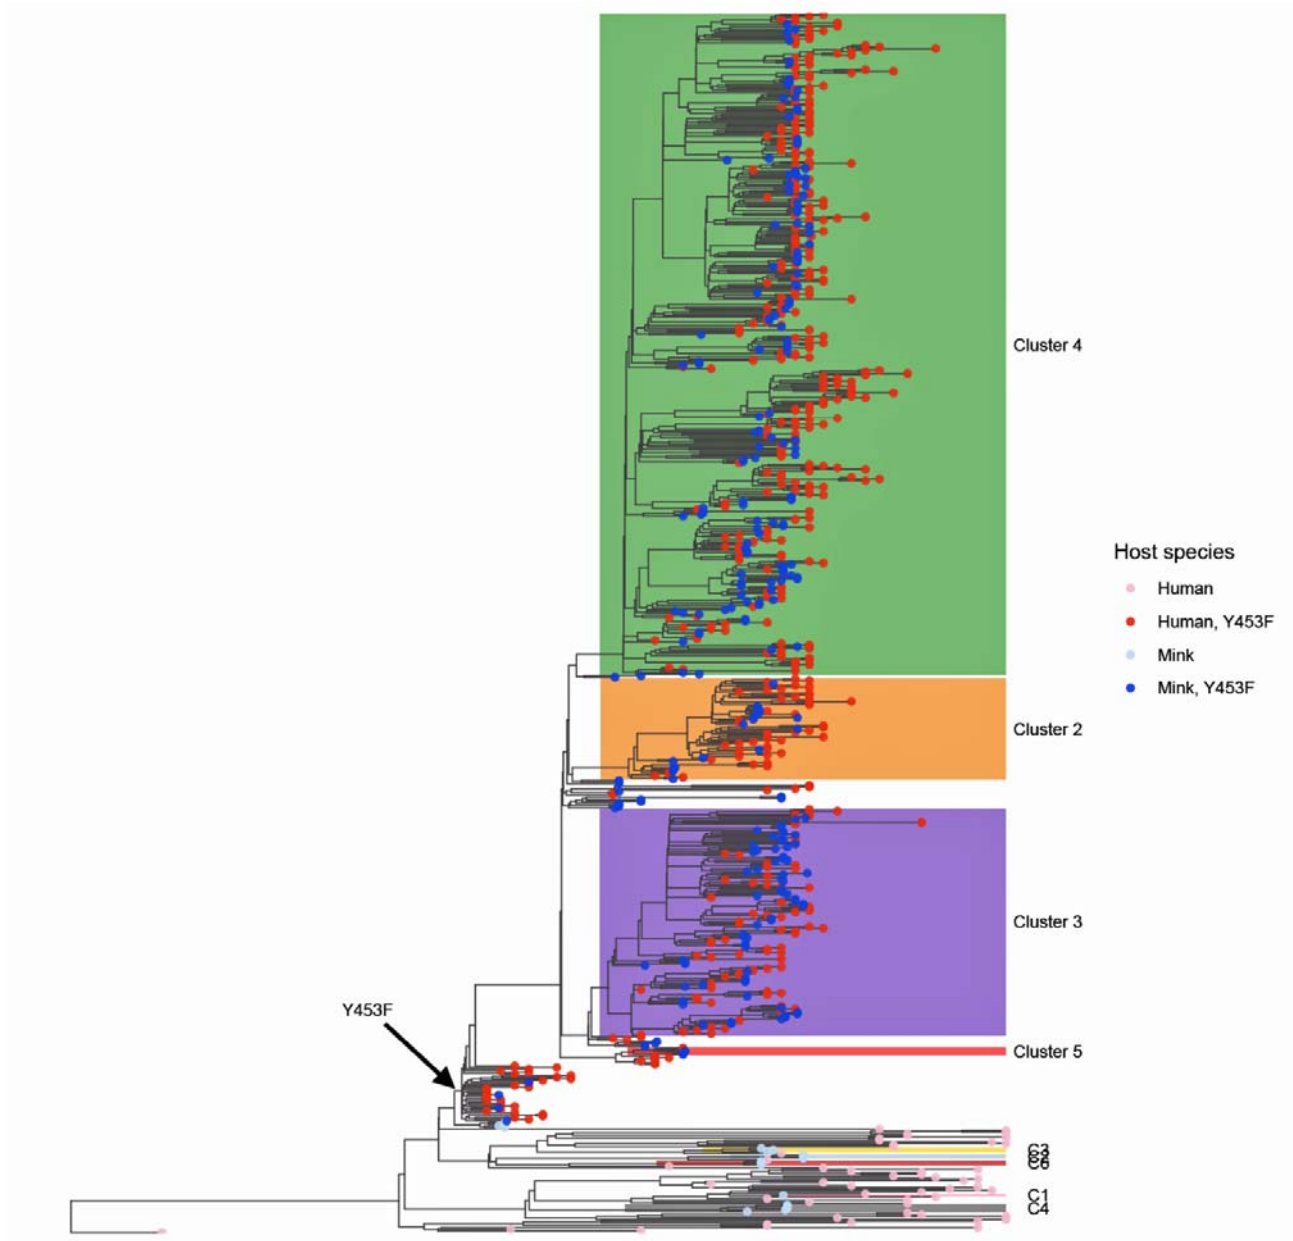

685

686

**Figure 3. Phylogenetic tree based on whole-genome SARS-CoV-2 sequences from viruses obtained from humans and mink.** Phylogenetic analysis was performed using BEAST2 with a strict clock model, GTR+gamma substitution model, and a BDSKY-serial tree prior. Shown here is the maximum clade-credibility (MCC) tree based on 17,500 post-burnin tree samples. Tips are colored based on host species (Human: red, Mink: blue), and on whether the encoded Spike protein contains the Y453F substitution (Yes: darker colors, No: lighter colors) resulting from the A22920T mutation. The Y453F substitution can be seen to evolve once (arrow pointing to tree branch), after which point it was retained in all descendant viruses. Also note how mink and human sequences are interspersed indicating frequent cross-species jumps.

691

692

693

694

695

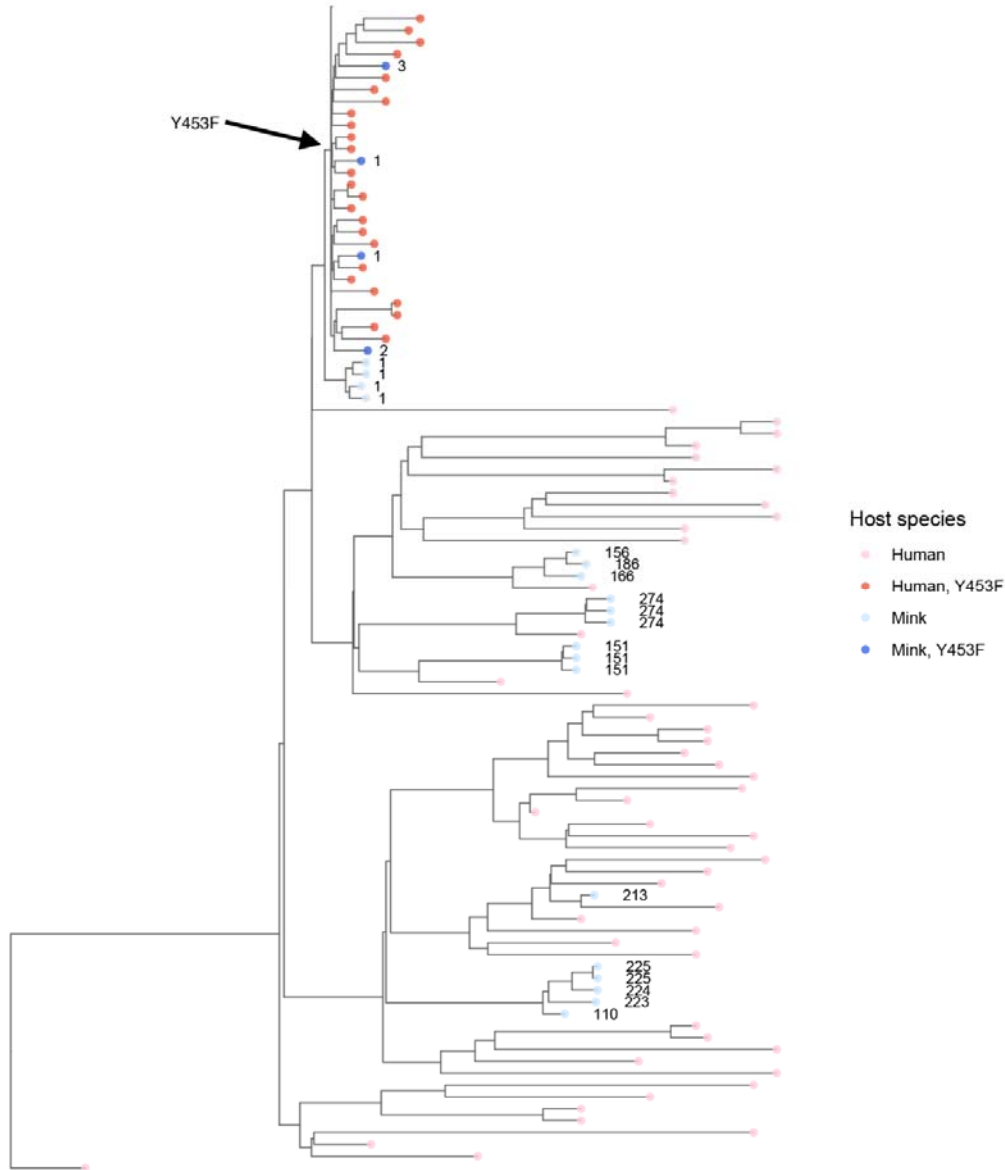

696

697 **Figure 4. Zoom of phylogenetic tree from Figure 3 showing details around the branch**  
698 **where the Y453F S protein substitution occurred.** Tips are colored based on host species  
699 (Human: red, Mink: blue) and on whether the encoded Spike protein contains the Y453F  
700 substitution (Yes: darker colors, no: lighter colors). Mink sequences are annotated with a  
701 number indicating the ID of the farm from which the sample was obtained. Note how only  
702 farm 1 had some mink without the Y453F change (light blue) and some with it (dark blue).  
703 This is consistent with the substitution occurring in the mink on farm 1.

704

705

706

707



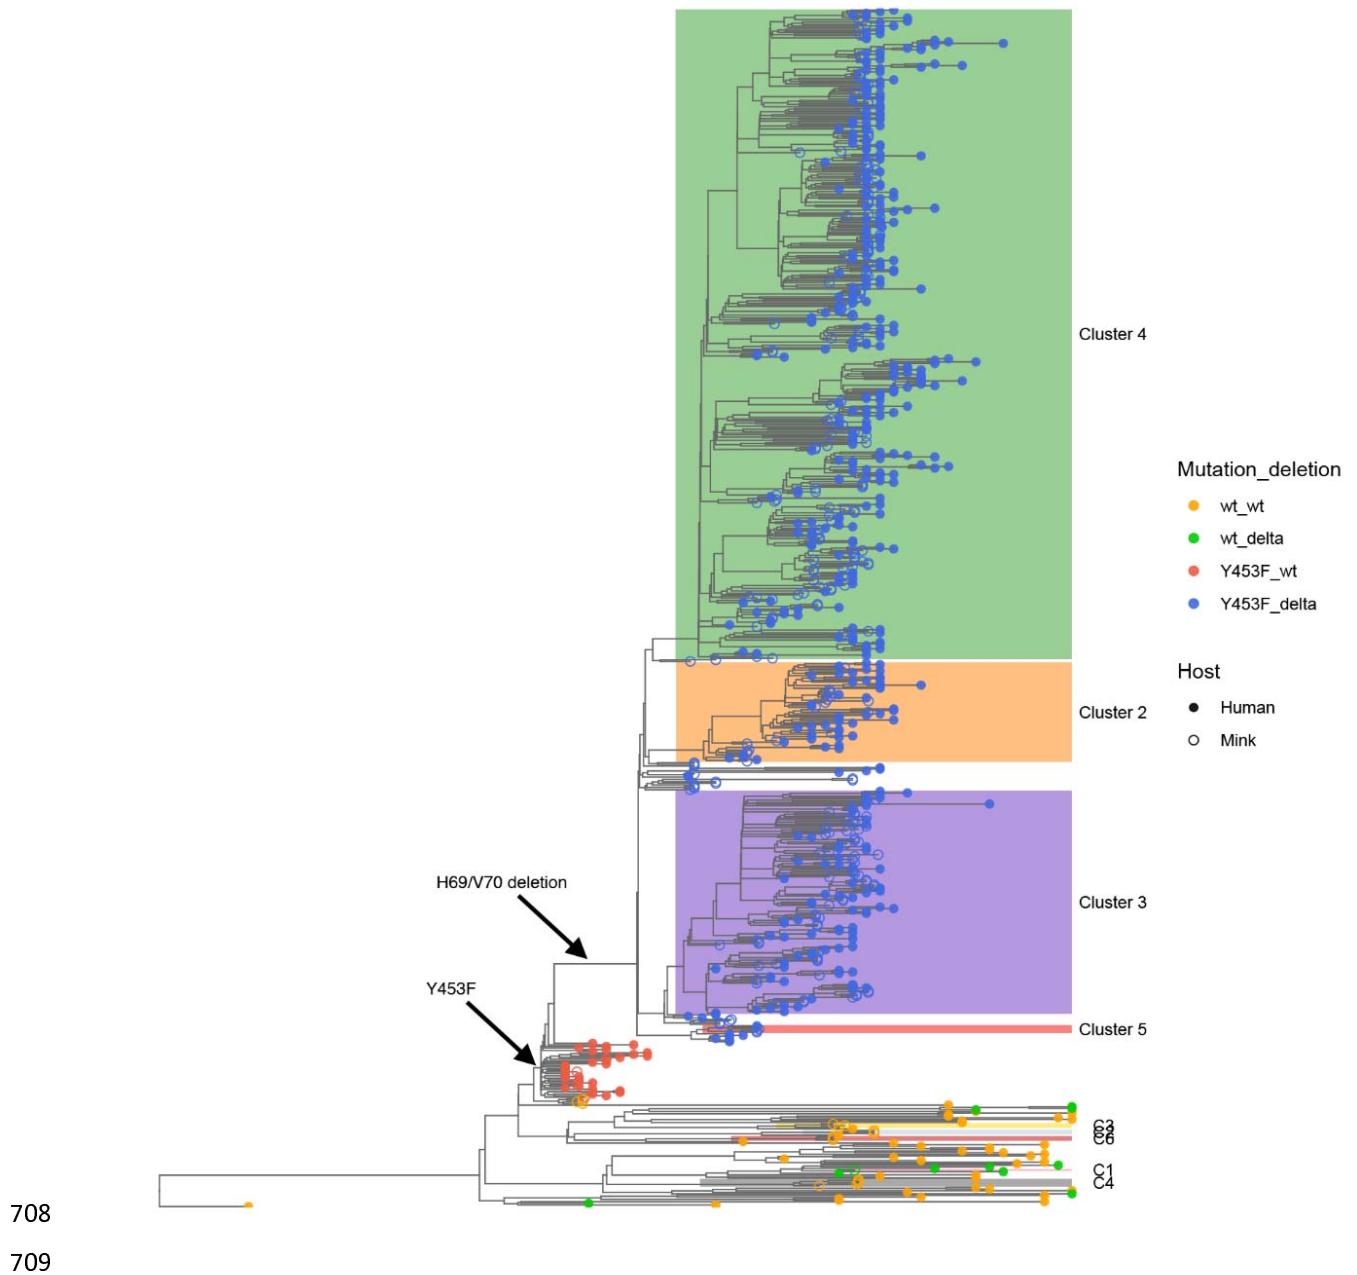

710 **Figure 5. Phylogenetic tree from Figure 3 with tips colored according to presence or**  
711 **absence of the Y453F S protein substitution and the H69/V70 S protein deletion.** The  
712 format used to label tips is <Y453F status>\_<deletion status>, with “wt” indicating the  
713 absence of substitution or deletion, “Y453F” indicating the presence of that substitution, and  
714 “delta” indicating the presence of the deletion: wt\_wt: orange, wt\_delta: green, Y453F\_wt:  
715 red, Y453F\_delta: blue. Host species is indicated using open circles for mink and closed  
716 circles for human. Note that the H69/V70 deletion appears shortly after the Y453F  
717 substitution (arrows pointing to branches), and both changes are subsequently present in all  
718 descendant sampled viruses, from both humans and mink. The deletion was also present in 4  
719 separate clades among viruses without Y453F (4 groups of green tips in bottom part –  
720 see Figure 6 for further detail).

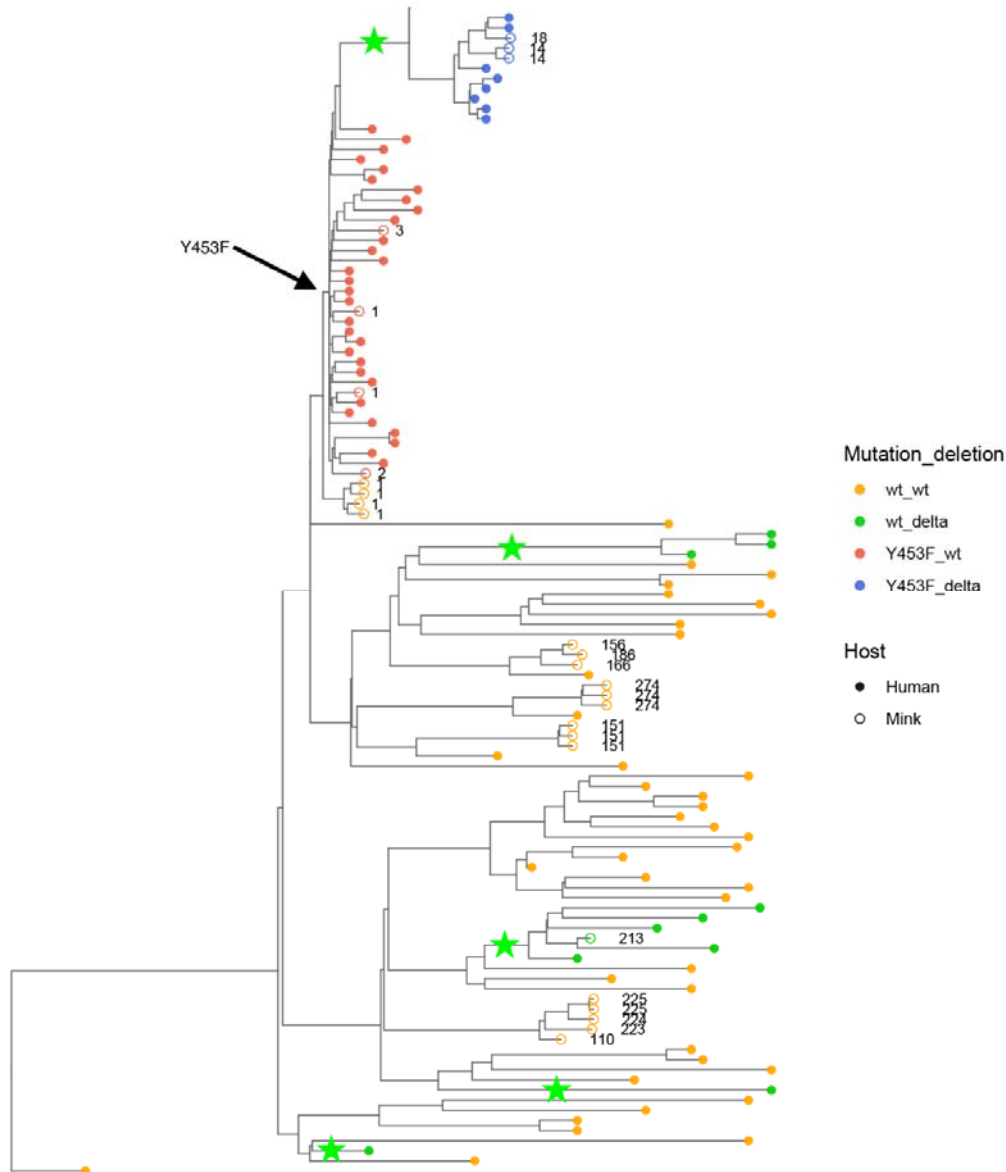

721  
722 **Figure 6. Zoom of phylogenetic tree from Figure 5 showing details around the branches**  
723 **where the H69/V70 deletion appeared.** Color scheme is the same as in Figure 5. Mink-  
724 derived sequences are further annotated with a number indicating the farm ID from which the  
725 sample was obtained. The deletion can be seen to have evolved on a branch shortly after the  
726 Y453F substitution and to then have been retained in all viruses descending from this branch  
727 (see upper part of tree in Figure 5). Among the viruses, that do not have Y453F, the deletion  
728 is present in 4 separate clusters (green tips in bottom part of tree). The basal branches (where  
729 the deletions presumably evolved) of these 4 clusters are indicated with green stars. Two of  
730 the 4 clusters are human singletons (green closed circles near bottom of plot) and may  
731 correspond to independent introductions into DK of viruses already harboring the deletion.  
732 The two other clusters contain multiple sequences (3 and 6 respectively), indicating that the  
733 deletion may have evolved in DK and subsequently spread. One of these clusters contains  
734 only humans sequences, while the other contains the sequence from a single mink (from farm  
735 213), that appears to have been infected by a human harboring virus with the deletion.

736

| Cluster       | Pangolin lineage | Clade | Spike protein signature <sup>1</sup> | Spike protein deletion* | No. of mink sequences | No. of farms | First sequence (date) | Last sequence (date) | Location                  |
|---------------|------------------|-------|--------------------------------------|-------------------------|-----------------------|--------------|-----------------------|----------------------|---------------------------|
| Initial cases | B.1.1.298        | 20B   | (Y435F)                              | (H69/V70)               | 43                    | 4            | 14-06                 | 06-11                | Northern Denmark          |
| 2             | B.1.1.298        | 20B   | Y453F                                | H69/V70                 | 174                   | 76           | 09-09                 | 12-11                | Northern/ Central Denmark |
| 3             | B.1.1.298        | 20B   | Y453F                                | H69/V70                 | 142                   | 66           | 14-09                 | 15-11                | Northern/ Central Denmark |
| 4             | B.1.1.298        | 20B   | Y453F                                | H69/V70                 | 272                   | 121          | 10-09                 | 03-12                | Northern/ Central Denmark |
| 5             | B.1.1.298        | 20B   | Y453F                                | H69/V70                 | 5                     | 5            | 31-08                 | 15-09                | Northern Denmark          |
| C1            | B.1.258.9        | 20A   | N439K;<br>G1223S                     | H69/V70                 | 2                     | 1            | 03-11                 | -                    | Southern Denmark          |
| C2            | B.1.1.219        | 20B   | F157L;<br>(A845S)                    |                         | 13                    | 4            | 16-10                 | 13-11                | Central Denmark           |
| C3            | B.1.1.170        | 20B   | (G1167S)                             |                         | 6                     | 3            | 23-10                 | 29-10                | Central Denmark           |
| C4            | B.1.536          | 20A   | (N501T)                              |                         | 19                    | 7            | 16-10                 | 18-11                | Southern Denmark          |
| C6            | B.1.1.294        | 20B   |                                      |                         | 3                     | 1            | 23-10                 | -                    | Northern Denmark          |
| C7            | B.1.1.159        | 20B   |                                      |                         | 3                     | 1            | 12-11                 |                      | Southern Denmark          |
| C8            | B.1.177          | 20E   | A222V                                |                         | 1                     | 1            | 02-11                 | -                    | Northern Denmark          |

737

738 <sup>1</sup>: Changes shown in parenthesis were only found in some of the mink sequences in the cluster  
 739

740 **Table 1. Summary of the SARS-CoV-2 sequences from infected mink from farms in**  
 741 **DK.** The features of the different Clusters (as identified in Figure 1) are shown. The later  
 742 introductions into mink from infected humans, designated C1-C8 are also indicated; these  
 743 viruses lack the Y453F change.

744
